# Supplementary material for: iNOS-derived nitric oxide promotes glycolysis by inducing pyruvate kinase M2 nuclear translocation in ovarian cancer
Source: PubMed Central journal article supplement (PMC5464849; doi:10.18632/oncotarget.16523), 2017-03-23
Supplement: oncotarget-08-33047-s001.pdf [file oncotarget-08-33047-s001.pdf]

## iNOS-derived nitric oxide promotes glycolysis by inducing pyruvate kinase M2 nuclear translocation in ovarian cancer

### Supplementary Materials

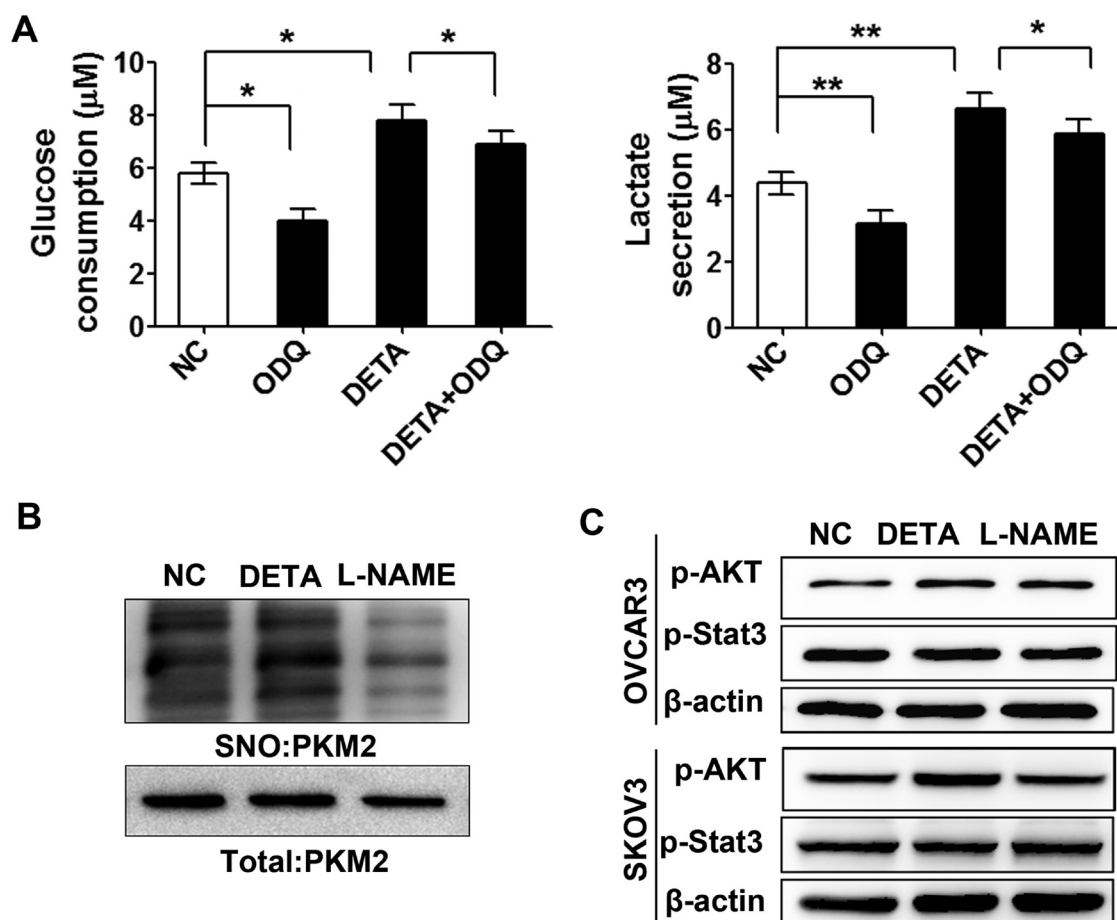

**Supplementary Figure 1:** (A) Nitric oxide-regulated glycolysis is partially mediated by sGC-cGMP signaling. Glucose consumption and lactate secretion were detected in SKOV3 cells after treated with DETA-NONOate, ODQ or their combination for 24 hours. Columns, mean ( $n = 3$ ); bars, s.e.m.;  $**P < 0.01$ . (B) Biotin-switch assay was carried out to detect the PKM2 S-nitrosylation in SKOV3 cells after treated with DETA-NONOate and L-NAME for 24 hours. (C) Unchanged levels of phospho-STAT3 and phospho-AKT as detected by immunoblotting in OVCAR3 and SKOV3 treated with DETA-NONOate ( $50 \mu\text{M}$ ) or L-NAME ( $1 \text{mM}$ ) for 24 hours.

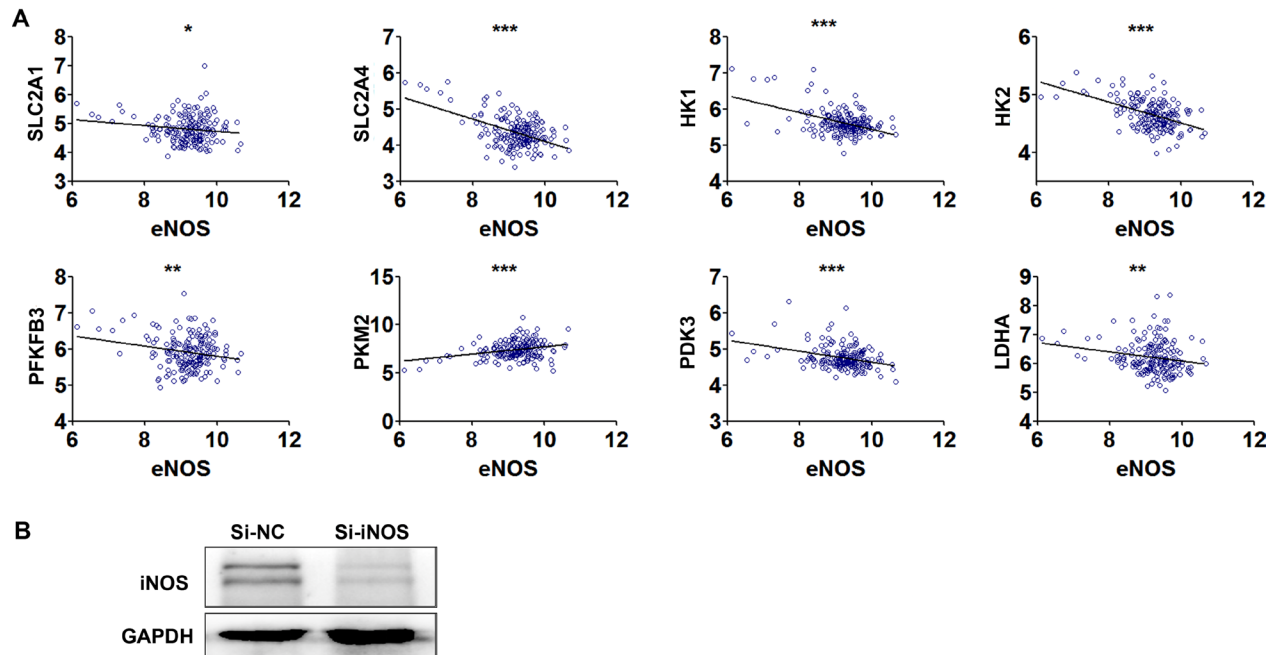

**Supplementary Figure 2:** (A) Scatter plot shows the negative correlation of eNOS mRNA values (x axis) with glycolytic genes *SLC2A1*, *SLC2A4*, *HK1*, *HK2*, *PFKFB3*, *PKM2*, *PDK3*, and *LDHA* (y axis) in 250 ovarian cancer patients. Global gene expression profiling of ovarian cancer was downloaded from Gene Expression Omnibus (GEO, GSE26712 and GSE14764). \* $P < 0.05$ ; \*\* $P < 0.01$ ; \*\*\* $P < 0.001$ . (B) iNOS was successfully knocked down by si-iNOS in SKOV3 cells as tested by immunoblotting assay.

**Supplementary Table 1: Primers for real-time PCR**

| <b>Gene name</b> | <b>Forward (5'→3')</b> | <b>Reverse (5'→3')</b>  |
|------------------|------------------------|-------------------------|
| GLUT1            | CAGGAGATGAAGGAAGAG     | TCGTGGAGTAAT AGA AGAC   |
| GLUT3            | CGGCTTCCTCATTACCTTC    | GGCACGACT TAG ACATTGG   |
| HK1              | GGGTCCTGCTGGTCCGTGTT   | TCCTCCCCTCGTCTCCTTCC    |
| HK2              | GGGTCCTGCTGGTCCGTGTT   | TCCTGCGGGATGGCGTAGAT    |
| PFK1             | CCGCATCAAGCAGTCAGCAG   | AGCCAGGTAGCCACAGTAGC    |
| PDK2             | TGAAGATGAGTGACCGAGG    | GCAATCCATAACCAAAAACC    |
| LDHA             | TGAAGTCGGCCTGATCATCG   | GACACCAGCAACATTCATTCC   |
| PKM2             | TGACGAGAACATCCTGTGGC   | GGAAGTCGGCACCTTTCTGC    |
| iNOS             | GAAGCGGAGACCCAAGAGA    | TCGCAAAGAGGATGGTGACT    |
| β-actin          | GTGGCCATCTCTTGCTGCAAG  | GGGAAATCGTGCGTGACATTAAG |
